# Supplementary material for: An electronic medical record-based intervention to improve hepatitis A vaccination rates in the emergency department during a regional outbreak
Source: HighWire-hosted journal article supplement (doi:10.1136/bmjoq-2022-001876), 2022-11-01
Supplement: bmjoq-2022-001876supp004_data_supplement.pdf [file bmjoq-2022-001876supp004_data_supplement.pdf]

| <b>Barrier to Completion</b>                                                       | <b>Example Comment</b>                                                                                                                                                                                    |
|------------------------------------------------------------------------------------|-----------------------------------------------------------------------------------------------------------------------------------------------------------------------------------------------------------|
| Discomfort with Asking Sensitive Questions                                         | <i>"I refuse to ask a male if he is having sex with another male. It's none of my business unless it's directly related to their chief complaint"</i>                                                     |
| Lack of Time                                                                       | <i>"Take it off the ER nurses' plate of things to do. This should be done in PCP office, upon admission, or even via phone"</i>                                                                           |
| Perception that the Emergency Department is not an Appropriate Place for Screening | <i>"Sorry but I usually find it annoying to ask, so few patients actually qualify for vaccine in EC. Is it worth the trouble? Feels like they keep adding screenings we need to do on every patient."</i> |

**Supplemental Material 4.** Qualitative summary of nurses' survey written comments.
